# Supplementary material
Source: PubMed Central journal article supplement (PMC7535920)
Supplement: supp_RA120.014652_161253_2_supp_574003_q33zvj.pdf [file supp_RA120.014652_161253_2_supp_574003_q33zvj.pdf]

## Supplemental Information:

### Cooperative dynamics across distinct structural elements regulate PTP1B activity

Kristiane R. Torgeson<sup>1</sup>, Michael W. Clarkson<sup>1</sup>, Ganesan Senthil Kumar<sup>1</sup>, Rebecca Page<sup>1</sup> & Wolfgang Peti<sup>1,\*</sup>

#### Contents:

- (1) **Figure S1.** A CH/ $\pi$  switch enables the WPD loop closure in PTP1B.
- (2) **Figure S2.** <sup>13</sup>C ILV assignment of PTP1B.
- (3) **Figure S3.** PTP1B helices  $\alpha 1'$  and  $\alpha 2'$  show slow exchange between a bound and unbound state.
- (4) **Figure S4.** PTP1B <sup>13</sup>C ILV fast timescale relaxation data at two magnetic fields.
- (5) **Figure S5.** PTP1B <sup>13</sup>C ILV fast timescale relaxation data.
- (6) **Figure S6.** Comparison of <sup>15</sup>N backbone and <sup>13</sup>C ILV side chain chemical shift perturbation (CSP) data of PTP1B upon TCS401 binding.

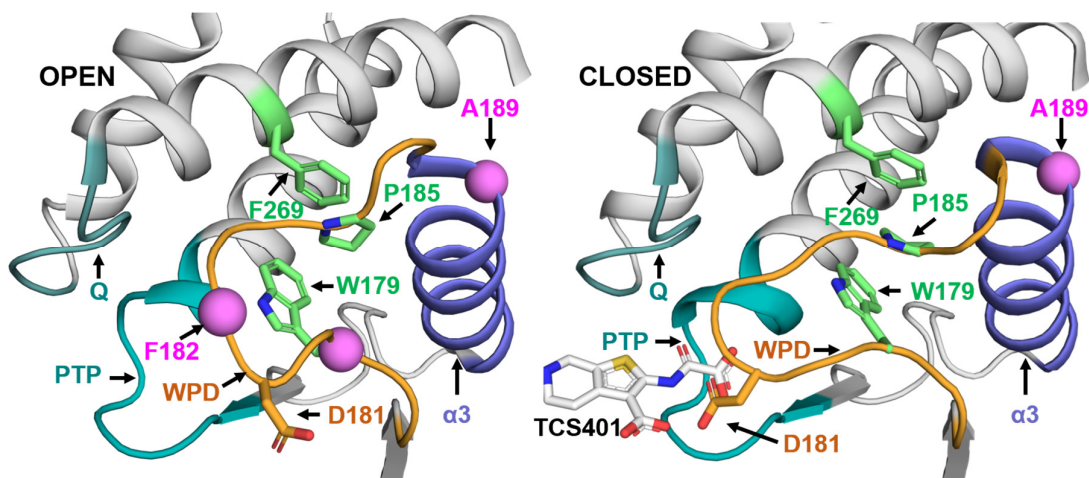

**Figure S1: A CH/ $\pi$  switch enables the WPD loop closure in PTP1B.** The open (left; PDB 5K9V) and closed (right; PDB 5K9W) state of PTP1B; the closed state is stabilized by adding saturating amounts of the PTP1B-specific inhibitor TCS-401 (sticks). Key structural components of PTP1B are highlighted, including the PTP and Q-loop (teal), the WPD-loop (orange) and helix  $\alpha$ 3 (lavender). Residues that form the CH/ $\pi$  switch that facilitates WPD loop closure during the catalytic cycle are labeled (F269, P185 and W179). Residues used previously for  $^{15}\text{N}$  ct-CPMG relaxation dispersion dynamics analysis are shown as pink spheres.

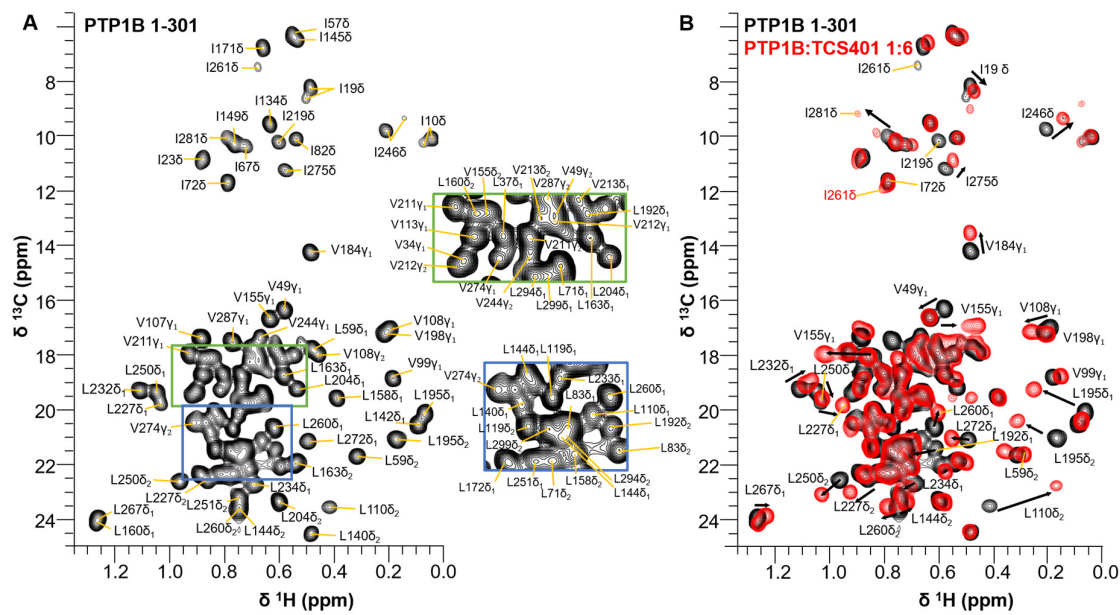

**Figure S2:**  $^{13}\text{C}$  ILV assignment of PTP1B. **(A)** Fully annotated 2D  $[^1\text{H}, ^{13}\text{C}]$  HSQC spectrum of PTP1B (residues 1-301). We did not perform a stereospecific assignment of Leu  $\delta$ 1/2 and Val  $\gamma$ 1/2 residues; rather, the cross-peak with the lowest  $^{13}\text{C}$  ppm value was always labeled 1. **(B)** Overlay of the 2D  $[^1\text{H}, ^{13}\text{C}]$  HSQC spectrum of PTP1B (black) with that of TCS401-saturated PTP1B (red; 1:6 ratio). Chemical shift perturbations (CSPs) are shown using arrows. All data measured at 18.8 T.

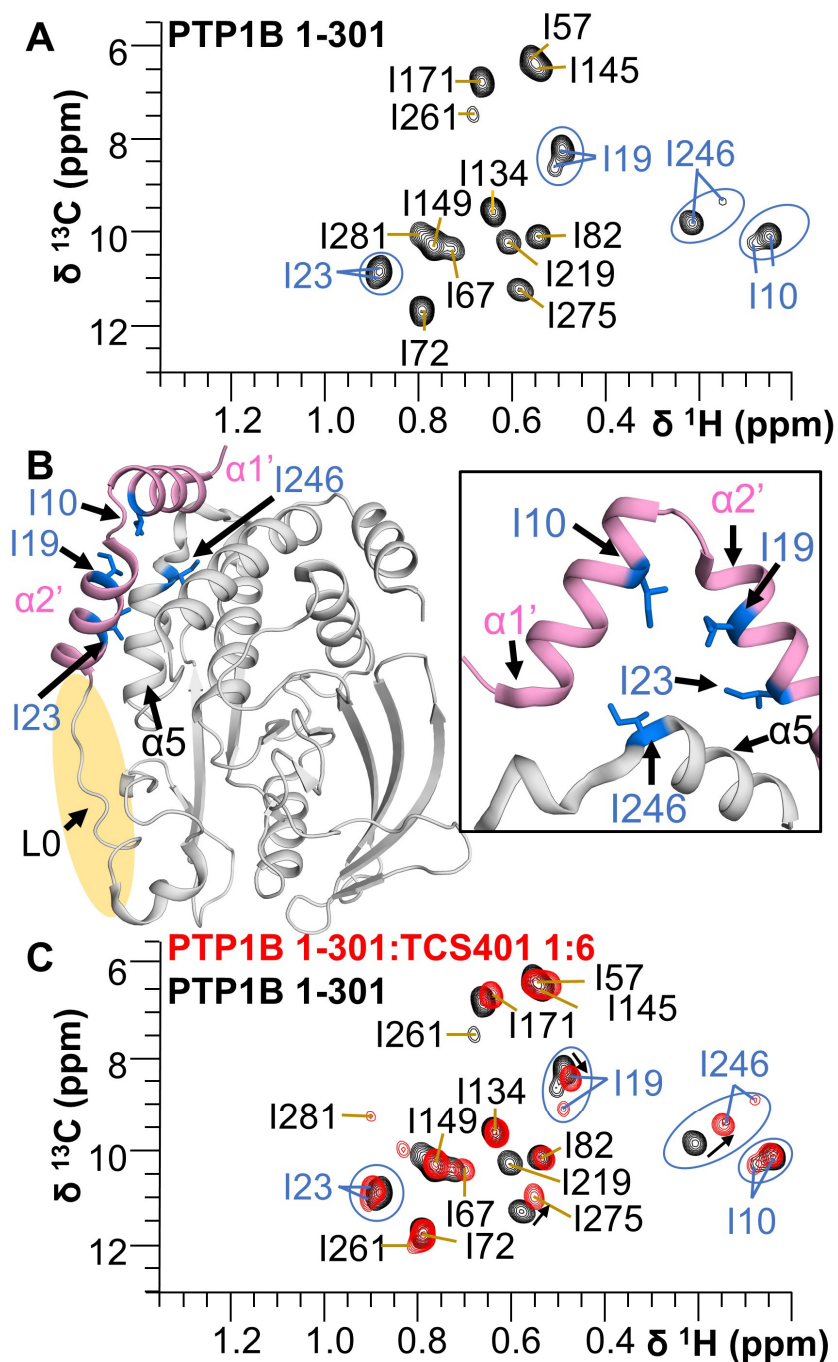

**Figure S3: PTP1B helices  $\alpha 1'$  and  $\alpha 2'$  show slow exchange between a bound and unbound state.** (A) 2D [ $^1\text{H}$ ,  $^{13}\text{C}$ ] HSQC of the  $^{13}\text{C}$  methyl Ile  $\delta$  region of PTP1B. Residues with duplicate peaks are highlighted by a blue circle. (B) PTP1B structure, with helices  $\alpha 1'$  and  $\alpha 2'$  colored pink, the Ile residues shown as sticks and colored blue and the linker L0 highlighted with a yellow ellipse. (C) Overlay of the 2D [ $^1\text{H}$ ,  $^{13}\text{C}$ ] HSQC of the  $^{13}\text{C}$  methyl Ile  $\delta$  region of PTP1B (black) with the 2D [ $^1\text{H}$ ,  $^{13}\text{C}$ ] HSQC of the  $^{13}\text{C}$  methyl Ile  $\delta$  region of PTP1B saturated with TCS401 (1:6 ratio; red). Ile residues that show duplicate peaks are highlighted with blue circles. All data measured at 18.8 T.

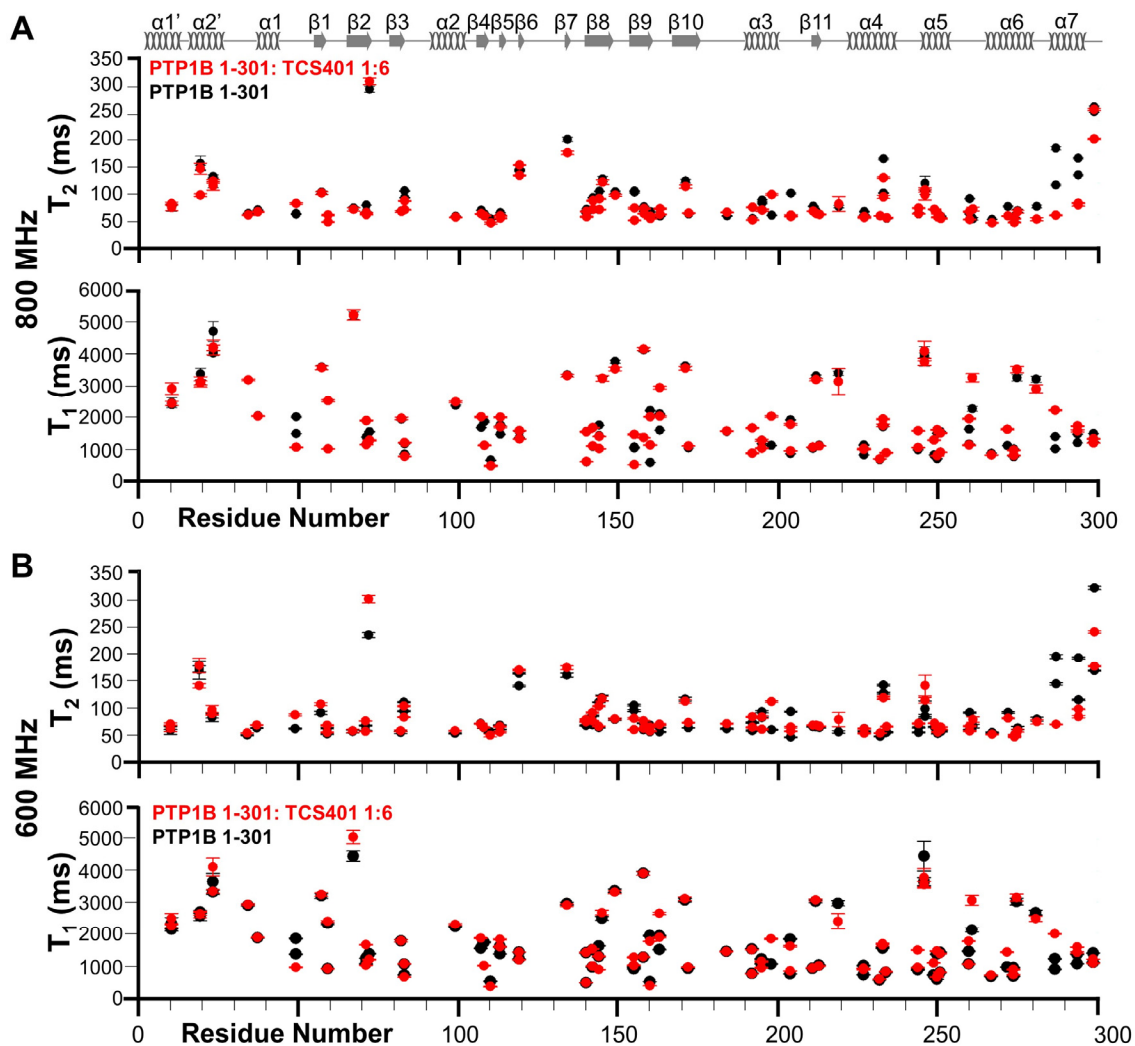

**Figure S4. PTP1B <sup>13</sup>C ILV fast timescale relaxation data at two magnetic fields. (A)** 18.8 T (800 MHz <sup>1</sup>H Larmor) T<sub>1</sub> and T<sub>2</sub> <sup>13</sup>C ILV side chain relaxation data for PTP1B (black) and PTP1B:TCS401 (1:6 ratio; red) plotted against PTP1B sequence; corresponding PTP1B secondary structural elements shown above. **(B)** 14.1 T (600 MHz <sup>1</sup>H Larmor) T<sub>1</sub> and T<sub>2</sub> <sup>13</sup>C ILV side chain relaxation data for PTP1B (black) and PTP1B:TCS401 (1:6 ratio; red) plotted against PTP1B sequence; corresponding PTP1B secondary structural elements shown above.

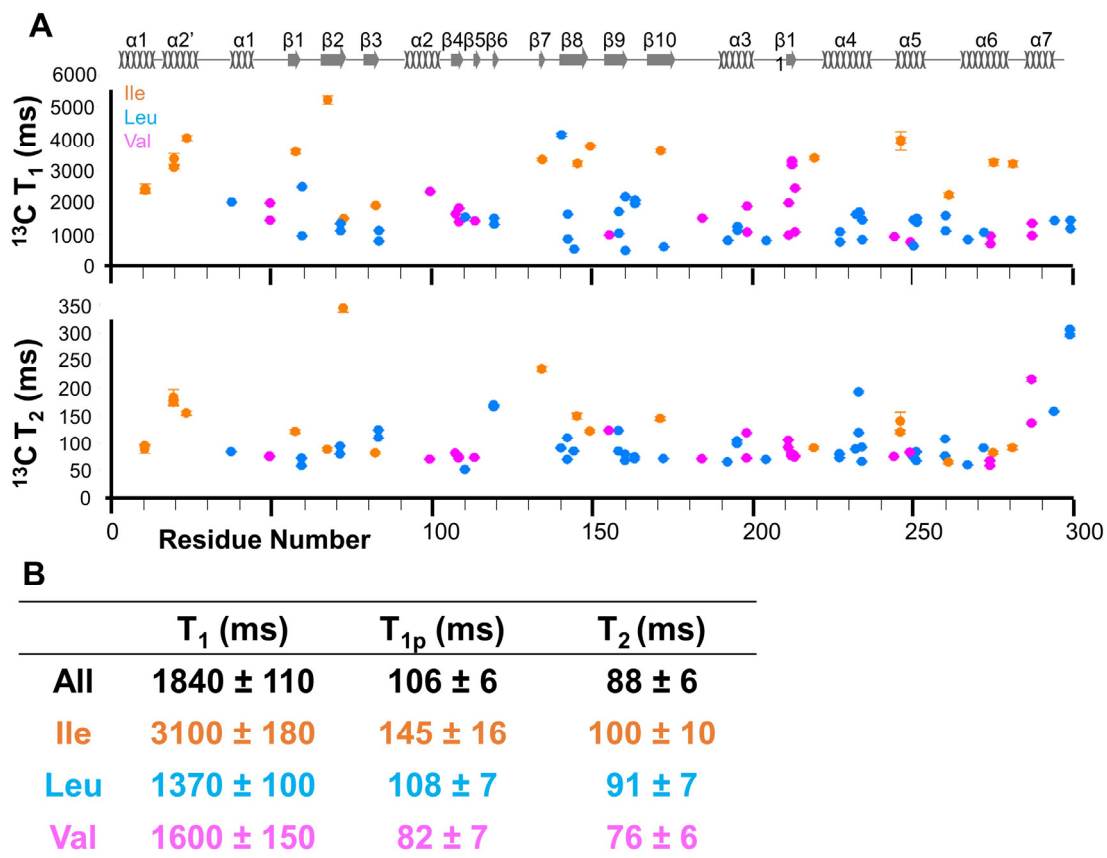

**Figure S5. PTP1B  $^{13}\text{C}$  ILV fast timescale relaxation data.** (A)  $T_1$  and  $T_2$   $^{13}\text{C}$  ILV side chain relaxation data plotted against PTP1B primary sequence and colored based on amino acid type: Ile (orange), Leu (blue) and Val (pink); corresponding PTP1B secondary structural elements shown above. (B) Table reporting the  $T_1$  and  $T_2$   $^{13}\text{C}$  ILV side chain relaxation data by amino acid type. All data measured at 18.8 T.

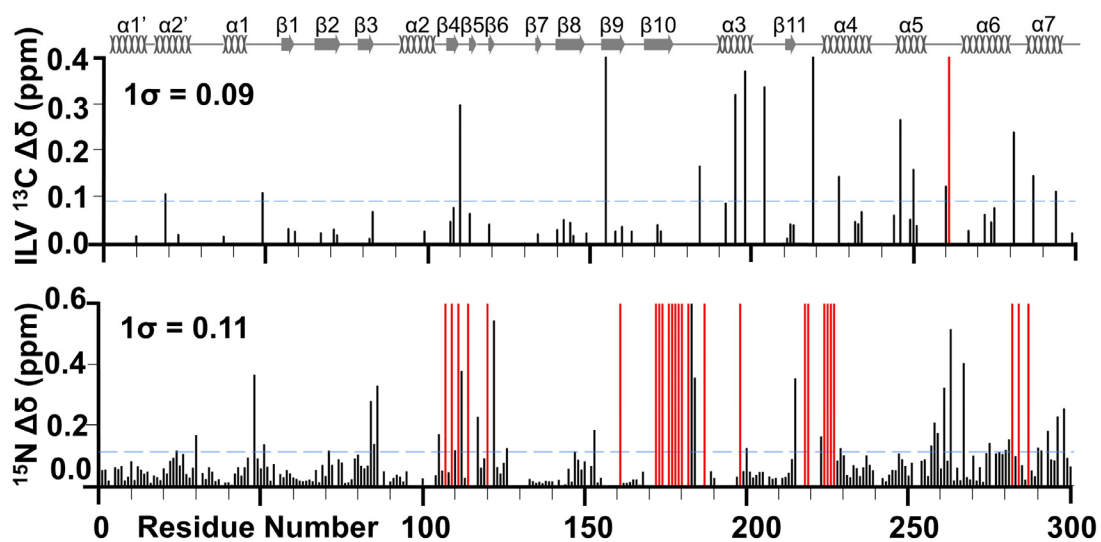

**Figure S6. Comparison of  $^{15}\text{N}$  backbone and  $^{13}\text{C}$  ILV side chain chemical shift perturbation (CSP) data of PTP1B upon TCS401 binding.** CSPs plotted against PTP1B residue number; corresponding PTP1B secondary structural elements shown above. Red lines indicate peaks that broadened beyond detection upon saturation with TCS401.
